# Supplementary material for: The Role of the Amygdala in Facial Trustworthiness Processing: A Systematic Review and Meta-Analyses of fMRI Studies
Source: PLOS journal article supplement (doi:10.1371/journal.pone.0167276), 2016-11-29
Supplement: S3 (10.1371/journal.pone.0167276.s003) [file journal.pone.0167276.s003]

**S1 Table. Characterization of the articles (n=20) included for systematic review.** (A) population, acquisition and analysis parameters; (B) experimental design, paradigm and stimuli.

| <b>A</b> |                     |                                                                         |             |               |                     |                                |                                                                                                                                                                                                                                            |                                                                |                                                |           |
|----------|---------------------|-------------------------------------------------------------------------|-------------|---------------|---------------------|--------------------------------|--------------------------------------------------------------------------------------------------------------------------------------------------------------------------------------------------------------------------------------------|----------------------------------------------------------------|------------------------------------------------|-----------|
| #        | Article             | Population                                                              | Sample size | Gender (M, F) | Age range (mean±SD) | System (Tesla)                 | Sequence                                                                                                                                                                                                                                   | Analysis (software)                                            | Template                                       | Smoothing |
| 1        | Baron et al., 2011  | Healthy controls                                                        | 24          | 15M, 9F       | 19-29 (23)          | 3T Siemens Allegra             | EPI (TR=2000 ms, TE=30 ms, flip angle=80°, matrix size=64x64); near whole brain coverage: 33 interleaved 3-mm axial slices                                                                                                                 | Analysis of Functional Neuro-images software (AFNI; Cox, 1996) | (Talairach, MNI)                               | 6 mm      |
| 2        | Bos et al., 2012    | Healthy controls (placebo-controlled testosterone administration study) | 16          | 16F           | - (20.8±2.0)        | 3T Philips Achieva MRI scanner | 3D PRESTO (T2*-weighted sagittal whole-brain images; TE=23 ms, TR=16 ms; FOV=224×224×136 mm; flip angle =9°); 2 runs of 450 scans with a volume acquisition time of 0.813 s, each volume: 39 sagittal slices; voxel size 3.5 mm isotropic. | SPM5                                                           | Talairach space (Talairach and Tournoux, 1998) | 8 mm      |
| 3        | Doallo et al., 2012 | Healthy controls                                                        | 12          | 4M, 8F        | 20-31 (-)           | 3T Tim Trio Siemens scanner    | EPI (T2*-weighted; E=30 ms, TR=3 s, flip angle=87°, matrix=64x64; FOV=192 mm; voxel size=3x3x3 mm <sup>3</sup> ). 45 contiguous transversal slices covered the whole brain                                                                 | SPM5                                                           | MNI                                            | 7 mm      |
| 4        | Engell et al., 2007 | Healthy controls                                                        | 15          | 9M, 5F        | - (22.4)            | 3T Siemens Allegra             | EPI, (TR = 2000 msec, TE = 30 msec, flip angle = 90°, matrix size = 64 x 64). Near whole-brain coverage: 33 interleaved 3-mm axial slices                                                                                                  | AFNI                                                           | MNI                                            | 6 mm      |

|   |                       |                                                 |             |                                         |                                       |                                        |                                                                                                                                                                                                       |                                              |                                                |                                    |
|---|-----------------------|-------------------------------------------------|-------------|-----------------------------------------|---------------------------------------|----------------------------------------|-------------------------------------------------------------------------------------------------------------------------------------------------------------------------------------------------------|----------------------------------------------|------------------------------------------------|------------------------------------|
| 5 | Freeman et al., 2014  | Healthy controls                                | 15 (exp. 2) | 4M, 12F (1 was later excluded) (exp. 2) | 18-35 (21.80) (exp. 2)                | 3T Philips Intera Achieva Scanner      | EPI (TR=2000 ms, TE=35 ms); 35 interleaved oblique-axial slices (3x3x4mm <sup>3</sup> voxels; no slice gap) parallel to the AC-PC line                                                                | BrainVoyagerQX (Brain Innovation)            | Talairach space (Talairach and Tournoux, 1998) | 6 mm                               |
| 6 | Gordon et al., 2009   | Healthy controls                                | 6           | 4M, 2F                                  | 21-29 (23.7)                          | 3T Siemens Magnetron Trio Scanner      | TR=2750ms; TE=30ms; Flip Angle=90; FoV=192; Slice Thickness=2mm & 0.8mm gap; images were collected at a 30° angle to the AC-PC line to minimize distortion of ventral PFC and amygdala                | FSL package of programs (Smith et al, 2004). | Talairach                                      | -                                  |
| 7 | Killgore et al., 2013 | Healthy controls                                | 39          | 22M, 17F                                | 18-45 (29.9±8.6)                      | 3T Tim Trio Siemens scanner            | T2*-weighted (TR=3.0 s, TE=30 ms, flip angle=90° FoV=22.4; matrix: 64 × 64 acquisition); 43 transverse slices (3.5 mm thickness, 0 skip) using an interleaved sequence, 80 images collected per slice | SPM8                                         | MNI                                            | 6 mm (resliced to 2×2×2 mm voxels) |
| 8 | Kim et al., 2012      | Healthy controls                                | 12          | 12M                                     | - (23.4±2.13) (3 were later excluded) | 3T Forte MRI scanner (ISOL Technology) | EPI (T2*-weighted EPIs with BOLD contrast; 64 × 64 voxels, TR=2000 msec, TE=30 msec, flip angle = 80°, 3×3 mm in-plane resolution, slice thickness = 4 mm, 24 oblique axial slices with no gap)       | SPM2                                         | MNI                                            | 6 mm                               |
| 9 | Kragel et al., 2014   | Healthy controls (sample of adolescent females) | 43          | 43F                                     | 10-20 (14.7)                          | 3T General Electric MR 750 system      | Sensitivity-encoded (SENSE) spiral-in pulse sequence along the axial plane (TR=2000 ms; TE=30 ms; matrix=64x128; alfa=70°; voxel size=3.8x3.8x3.8mm <sup>3</sup> ; 34 contiguous slices).             | SPM8                                         | MNI                                            | 4 mm                               |

|    |                         |                                                                                                             |    |          |                    |                                                                |                                                                                                                                                                                                                                                                                                                                                         |                                                     |     |      |
|----|-------------------------|-------------------------------------------------------------------------------------------------------------|----|----------|--------------------|----------------------------------------------------------------|---------------------------------------------------------------------------------------------------------------------------------------------------------------------------------------------------------------------------------------------------------------------------------------------------------------------------------------------------------|-----------------------------------------------------|-----|------|
| 10 | Mattavelli et al., 2012 | Healthy controls                                                                                            | 20 | 10M, 10F | 18-35              | 3T HD MRI system with an eight channels phased array head coil | EPI (T2*-weighted with BOLD contrast; TR=3 s, TE=32.7 ms, flip-angle=90°, acquisition matrix 128x128, FOV=288x288 mm); whole head volumes: 38 contiguous axial slices, in-plane resolution of 2.25x2.25 mm and a slice thickness of 3mm; slices positioned for each participant to ensure optimal imaging of temporal lobe regions (including amygdala) | FSL-FEAT (FMRI Expert Analysis Tool)                | MNI | 6 mm |
| 11 | Pinkham et al., 2008a   | Schizophrenia schizoaffective disorder (paranoid, non-paranoid), Autism spectrum disorder, Healthy controls | 12 | 12M      | 18-35 (27.08±3.99) | 3T Siemens Allegra                                             | EPI (T2*-weighted images with BOLD contrast (2D; TR=2 s, TE=30 ms, flip angle=80, 32 transverse slices, voxel size= 3.8x3.8x3.8 mm, matrix=64x64; FOV=243x243)                                                                                                                                                                                          | SPM2 and the WFU Pick Atlas (Maldjian et al., 2003) | MNI | 8 mm |
| 12 | Pinkham et al., 2008b   | Schizophrenia schizoaffective disorder (paranoid, non-paranoid), Healthy controls                           | 12 | 12M      | 18-35 (27.08±3.99) | 3T Siemens Allegra                                             | EPI (T2*-weighted with BOLD contrast; 2D; 32 transverse slices, voxel size 3.8x 3.8x3.8 mm, matrix = 64 x 64; FOV=243x243, TR=2 s, TE=30 ms, flip angle = 80)                                                                                                                                                                                           | SPM2                                                | MNI | 8 mm |
| 13 | Platek et al., 2008     | Healthy controls                                                                                            | 11 | 4M, 7F   | - (-)              | 3T scanner                                                     | Rapid event-related fMRI (2x300 42 slice (10% gap) full brain coverage volumes; TR = 2.5, TE = 30 (ms), FoV= 19.2 cm, flip angle = 85)                                                                                                                                                                                                                  | FSL-FEAT                                            | MNI | 6 mm |

|    |                       |                            |    |          |                 |                             |                                                                                                                                                                                                                                                                                                                            |                                                      |           |                   |
|----|-----------------------|----------------------------|----|----------|-----------------|-----------------------------|----------------------------------------------------------------------------------------------------------------------------------------------------------------------------------------------------------------------------------------------------------------------------------------------------------------------------|------------------------------------------------------|-----------|-------------------|
| 14 | Rule et al., 2013     | Healthy controls           | 14 | 14F      | -<br>(-)        | 3T Siemens Tim Trio Scanner | EPI (T2*-weighted with BOLD contrast; TR=2,000 ms); 31 axial slices per whole-brain volume, 3-mm in-plane resolution, 4-mm thickness, 0-mm skip                                                                                                                                                                            | SPM8                                                 | Talairach | 8 mm              |
| 15 | Ruz et al., 2011      | Healthy controls           | 18 | 8M, 10F  | 20-31<br>(-)    | 3T Trio scanner             | EPI (T2*-weighted; TR=2.1 s; TE=22 ms, flip angle=90°); 35 interleaved sagittal slices with a thickness of 4 mm, tilted 30° to the AC-PC line to optimize sensitivity to orbitofrontal cortex and medial temporal lobes covered the entire brain (64x64 matrix with a field of view of 192x192 mm, voxel size of 3x3x4 mm) | SPM5                                                 | MNI       | 8 mm <sup>3</sup> |
| 16 | Said et al., 2009     | Healthy controls           | 32 | 17M, 15F | -<br>(22.8±6.8) | 3T Siemens Allegra          | EPI (TR = 2000 msec, TE = 33 msec, flip angle = 90°, matrix size, 64x64); whole brain coverage was achieved with 34 interleaved 3.6-mm axial slices with an interslice gap of 0.36 mm                                                                                                                                      | AFNI, Analysis of Functional NeuroImages (Cox, 1996) | MNI       | 4-mm              |
| 17 | Todorov et al., 2008  | Healthy controls           | 14 | 7M, 7F   | 18-27<br>(-)    | 3T Siemens Allegra          | EPI (TR=2000 ms, TE=30 ms, flip angle=80°, matrix Size=64x64). By using 33 interleaved 3-mm axial slices; near whole brain coverage                                                                                                                                                                                        | AFNI, Analysis of Functional NeuroImages (Cox, 1996) | Talairach | 6mm               |
| 18 | Tsukiura et al., 2013 | Healthy controls           | 23 | 23F      | -<br>(23.8±2.2) | 3T Philips Achieva scanner  | EPI (BOLD contrast; 64x64 matrix, TR=2000ms, TE=30 ms, flip angle=70°, FOV=24 cm, 34 slices, 3.75mm slice thickness)                                                                                                                                                                                                       | SPM8                                                 | MNI       | 8-mm              |
| 19 | van Rijn et al., 2012 | Klinefelter syndrome (KS); | 18 | 18M      | -<br>(32.2±9.4) | 1.5T Philips ACSNT          | 2D-EPI (BOLD contrast; TE=40 ms; TR=2500 ms;                                                                                                                                                                                                                                                                               | SPM2                                                 | MNI       | 6mm               |

|    |                      |                  |    |        |              |                          |                                                                                                                                                      |       |           |      |
|----|----------------------|------------------|----|--------|--------------|--------------------------|------------------------------------------------------------------------------------------------------------------------------------------------------|-------|-----------|------|
|    |                      | Healthy controls |    |        |              | scanner                  | flip angle=90°; FoV=192x192 mm); each volume comprised 33 axial scans with 2.2mm slice thickness (and a gap of 0.8 mm); voxel size was 3mm isotropic |       |           |      |
| 20 | Winston et al., 2002 | Healthy controls | 12 | 8M, 8F | 18-30 (23.3) | 2T Siemens VISION system | EPI (T2*-weighted images with BOLD contrast; TR=2.5 s); each volume comprised 33 × 2.2 mm axial scans with 3-mm in-plane resolution                  | SPM99 | Talairach | 8-mm |

## B

| # | Article             | Dimensions studied                                             | Type of task<br><i>implicit, explicit (subliminal, supraliminal)</i>                                  | Type of stimulus<br><i>neutral-emotional (real, avatar)</i> | Stimulus presentation | Paradigm      | Baseline condition | Response type                                                         |
|---|---------------------|----------------------------------------------------------------|-------------------------------------------------------------------------------------------------------|-------------------------------------------------------------|-----------------------|---------------|--------------------|-----------------------------------------------------------------------|
| 1 | Baron et al., 2011  | Trustworthiness                                                | Implicit (memory task – cover story)<br><br>(supraliminal)                                            | Neutral faces (with direct eye-gaze)<br><br>(real faces)    | static                | Event-related | Fixation cross     | Indicate whether or not they had seen the ‘test-image’ (Button press) |
| 2 | Bos et al., 2012    | Trustworthiness                                                | Explicit (trustworthiness judgements) and implicit (age judgements) tasks<br><br>(supraliminal)       | Neutral faces<br><br>(real faces)                           | static                | Event-related | Fixation cross     | Button press                                                          |
| 3 | Doallo et al., 2012 | Inhibitory control and emotional devaluation (trustworthiness) | Explicit (trustworthiness judgements) and implicit (ethnicity judgements) tasks<br><br>(supraliminal) | Neutral faces (with direct eye-gaze)<br><br>(real faces)    | static                | Event-related | Fixation cross     | Button press (index or middle finger of the left or right hand)       |

|    |                         |                                                                 |                                                                                                |                                                               |        |                                                               |                |                                                                                                                            |
|----|-------------------------|-----------------------------------------------------------------|------------------------------------------------------------------------------------------------|---------------------------------------------------------------|--------|---------------------------------------------------------------|----------------|----------------------------------------------------------------------------------------------------------------------------|
| 4  | Engell et al., 2007     | Trustworthiness (idiosyncratic perception or consensus ratings) | Implicit (memory task/identity judgements)<br>(supraliminal)                                   | Neutral faces (with direct eye-gaze)<br>(real faces)          | static | Block-design                                                  | Fixation cross | Report whether the identity of the test face was the same as any of the faces in that block<br>(Button press)              |
| 5  | Freeman et al., 2014    | Trustworthiness                                                 | Passive viewing<br>(subliminal and supraliminal)                                               | Neutral faces (with direct eye-gaze)<br>(real faces, exp. 2)  | static | Experiment 1 (block- design);<br>Experiment 2 (event-related) | Fixation cross | Passive viewing                                                                                                            |
| 6  | Gordon et al., 2009     | Trust behaviour, Psychopathy, Machiavellianism                  | Implicit (gender judgements)<br>(supraliminal)                                                 | Neutral faces (with direct eye-gaze)<br>(real faces)          | static | Event-related                                                 | Fixation cross | Make sex discrimination of a face while being scanned<br>(Button press)                                                    |
| 7  | Killgore et al., 2013   | Trustworthiness; Emotional intelligence                         | Passive viewing<br>(supraliminal)                                                              | Faces (neutral, trustworthy, untrustworthy)<br>(avatar faces) | moving | Block design                                                  | Fixation cross | Button press (dominant hand)                                                                                               |
| 8  | Kim et al., 2012        | Trustworthiness; First impressions                              | Implicit (Ultimatum game)<br>(supraliminal)                                                    | Neutral faces (with direct eye-gaze)<br>(real faces)          | static | Event-related                                                 | Fixation cross | Accept or reject the offer<br>(Button press)                                                                               |
| 9  | Kragel et al., 2014     | Trustworthiness; Age-related changes                            | Explicit (trustworthiness judgements)<br>(subliminal and supraliminal)                         | Neutral faces (with direct eye-gaze)<br>(real faces)          | static | Event-related                                                 | Fixation cross | Four symbols ('--', '-', '+', '++') prompting for a response ranging from low to high trustworthiness<br>(Button press)    |
| 10 | Mattavelli et al., 2012 | Trustworthiness                                                 | Explicit (trustworthiness judgements) and implicit (gender judgements) tasks<br>(supraliminal) | Faces (varied in pose, age and expression)<br>(real faces)    | static | Block design                                                  | Fixation cross | Instructed to look at the stimuli and press with the right index finger a whenever they saw the red spot<br>(Button press) |

|    |                       |                                                        |                                                                                              |                                                                                                                                             |        |               |                                                                                 |                                                                                                                               |
|----|-----------------------|--------------------------------------------------------|----------------------------------------------------------------------------------------------|---------------------------------------------------------------------------------------------------------------------------------------------|--------|---------------|---------------------------------------------------------------------------------|-------------------------------------------------------------------------------------------------------------------------------|
| 11 | Pinkham et al., 2008a | Trustworthiness                                        | Explicit (trustworthiness judgements) and implicit (age judgements) tasks (supraliminal)     | faces taken from the Trustworthiness/ Approachability Task (Adolphs et al., 1998).<br><br>Neutral faces (with direct eye-gaze) (real faces) | static | Event-related | Fixation cross                                                                  | Button press                                                                                                                  |
| 12 | Pinkham et al., 2008b | Trustworthiness                                        | Explicit (trustworthiness / approachability task) (supraliminal)                             | Neutral faces (with direct eye-gaze) (faces taken from the Trustworthiness/ Approachability Task (Adolphs et al., 1998)) (real faces)       | static | Event-related | Fixation baseline                                                               | Button press                                                                                                                  |
| 13 | Platek et al., 2008   | Trustworthiness                                        | Implicit (gender and ethnicity judgements) (supraliminal)                                    | Neutral faces (with direct eye-gaze) (real faces)                                                                                           | static | Event-related | A jittered ISI with null events consisting of scrambled luminance matched faces | Response in the period 2000s following stimulus; participants were instructed not to respond to the null event (Button press) |
| 14 | Rule et al., 2013     | Trustworthiness                                        | (study 5 – fMRI) Implicit (face symmetry judgements) (supraliminal)                          | Neutral faces (with direct eye-gaze) (real faces)                                                                                           | static | Event-related | Fixation cross                                                                  | Button press                                                                                                                  |
| 15 | Ruz et al., 2011      | emotional conflict (given by trustworthiness profiles) | Explicit (Ultimatum game – the partner was signaled/cued as trustworthy or as untrustworthy) | Karolinska Directed Emotional Faces database (happy, angry)                                                                                 | static | Event-related | Fixation point                                                                  | Accept or reject the offers (index and middle fingers of their right hand) (Button press)                                     |

|    |                       |                                                            |                                                                                              |                                                                                           |        |               |                        |                                      |
|----|-----------------------|------------------------------------------------------------|----------------------------------------------------------------------------------------------|-------------------------------------------------------------------------------------------|--------|---------------|------------------------|--------------------------------------|
|    |                       | during interpersonal interactions                          | (supraliminal)                                                                               | (real faces)                                                                              |        |               |                        |                                      |
| 16 | Said et al., 2009     | Trustworthiness                                            | Explicit (trustworthiness judgements)                                                        | Neutral faces (with direct eye-gaze)                                                      | static | Event-related | Fixation cross         | Button press                         |
|    |                       |                                                            | (supraliminal)                                                                               | (real faces)                                                                              |        |               |                        |                                      |
| 17 | Todorov et al., 2008  | Trustworthiness; Valence (avoidance - approach) evaluation | Implicit (memory task/identity judgements – cover story)                                     | Faces (neutral, trustworthy, untrustworthy)                                               | static | Event-related | Fixation cross (12-s)  | Button press                         |
|    |                       |                                                            | (supraliminal)                                                                               | (avatar faces)                                                                            |        |               |                        |                                      |
| 18 | Tsukiura et al., 2013 | Trustworthiness                                            | Explicit (rate personality goodness on the basis of trustworthiness)                         | Neutral male faces (with direct eye-gaze)                                                 | static | Event-related | Fixation interval      | Button press (8-button response box) |
|    |                       |                                                            | (supraliminal)                                                                               | (real faces)                                                                              |        |               |                        |                                      |
| 19 | van Rijn et al., 2012 | Trustworthiness                                            | Explicit (trustworthiness judgements) and implicit (age judgements) tasks                    | Neutral faces (with direct eye-gaze)                                                      | static | Block-design  | Baseline blocks (45 s) | Button press                         |
|    |                       |                                                            | (supraliminal)                                                                               | (real faces)                                                                              |        |               |                        |                                      |
| 20 | Winston et al., 2002  | Trustworthiness                                            | Explicit (trustworthiness judgements) and implicit (School-University[age] judgements) tasks | Neutral faces (although screened with happy, sad, angry, disgust, fear, surprise ratings) | static | Event-related | Fixation cross         | Button press                         |
|    |                       |                                                            | (supraliminal)                                                                               | (real faces)                                                                              |        |               |                        |                                      |



*Legend: -, missing information; M, males, F, females; BOLD, blood oxygenation level-dependent; FOV, field of view; EPI, echo-planar functional imaging; TE, echo time; TR, repetition time.*
